# Supplementary material for: Massive carbon addition to an organic-rich Andosol increased the subsoil but not the topsoil carbon stock
Source: Copernicus journal article supplement (doi:10.5194/bg-15-2743-2018), 2018-05-07
Supplement: Supplementary file 1 [file bg-15-2743-2018-supplement.zip]

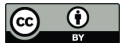

## *Supplement of*

# **Massive carbon addition to an organic-rich Andosol increased the subsoil but not the topsoil carbon stock**

**Antonia Zieger et al.**

*Correspondence to:* Antonia Zieger ([antonia.zieger@tu-berlin.de](mailto:antonia.zieger@tu-berlin.de))

- [bg-15-2743-2018-supplement-title-page.pdf](#)
- [DataFig2.csv](#)
- [DataFig36.csv](#)
- [DataFig45.csv](#)
- [DataFig7.F3.csv](#)
- [DataFig7.F4.csv](#)
- [README.txt](#)

The copyright of individual parts of the supplement might differ from the CC BY 4.0 License.
